# Supplementary material for: Spatiotemporal heterogeneity of glioblastoma is dictated by microenvironmental interference
Source: Research Square preprint supplement (doi:10.21203/rs.3.rs-244902/v1), 2021-02-16
Supplement: Supplementary file 1 [file 02ae8cad9fccbebf4f2aaf53.xlsx]

## Sheet: Tabelle1
ID	Tissue Type	Batch	Region	Age	Tumor	Histology	Sex	MALDI	IMC
#275UKF	T	6	frontal	80	IDH-WT	GBM	f	1	1
#270UKF	T	6	frontal	41	IDH-MUT	AA	m
#269UKF	T	6	Occipital	51	IDH-WT	GBM	m
#268UKF	T	6	frontal	49	IDH-MUT	ODG	f
#266UKF	T	6	temporal	76	IDH-WT	GBM	f
#265UKF	C	2	temporal	55	C	Cortex	m
#265UKF	T	2	temporal	55	IDH-WT	GBM	m
#262UKF	T	5	temporal	59	IDH-WT	GBM	m	1	1
#260UKF	T	5	temporal	81	IDH-WT	GBM	m	1	1
#259UKF	T	3	temporal	75	IDH-WT	GBM	f	1	1
#256UKF	C	4	temporal	64	C	Cortex	f
#256UKF	TC	4	temporal	64	IDH-WT	GBM	f
#256UKF	TI	4	temporal	64	IDH-WT	GBM	f
#255UKF	T	5	temporal	81	IDH-WT	GBM	f
#251UKF	T	4	temporal	61	IDH-WT	GBM	m
#248UKF	C	1	frontal	44	C	Cortex	m	1	1
#248UKF	T	1	frontal	44	IDH-WT	GBM	m
#243UKF	T	1	frontal	55	IDH-WT	GBM	f
#242UKF	C	1	frontal	81	C	Cortex	f
#242UKF	T	1	frontal	81	IDH-WT	GBM	f
#241UKF	C	1	temporal	19	C	Cortex	m
#259UKF	T	3	temporal	75	IDH-WT	GBM	f
#296UKF	T	9	temporal	34	IDH-WT	GBM	m	1	1
#304UKF	T	9	temporal	81	IDH-WT	GBM	m
